# Supplementary figures and images for: Complete Range of the Universal mtDNA Gene Pool and High Genetic Diversity in the Thai Dog Population
Source: MDPI journal article supplement (doi:10.3390/genes11030253), 2020-02-27

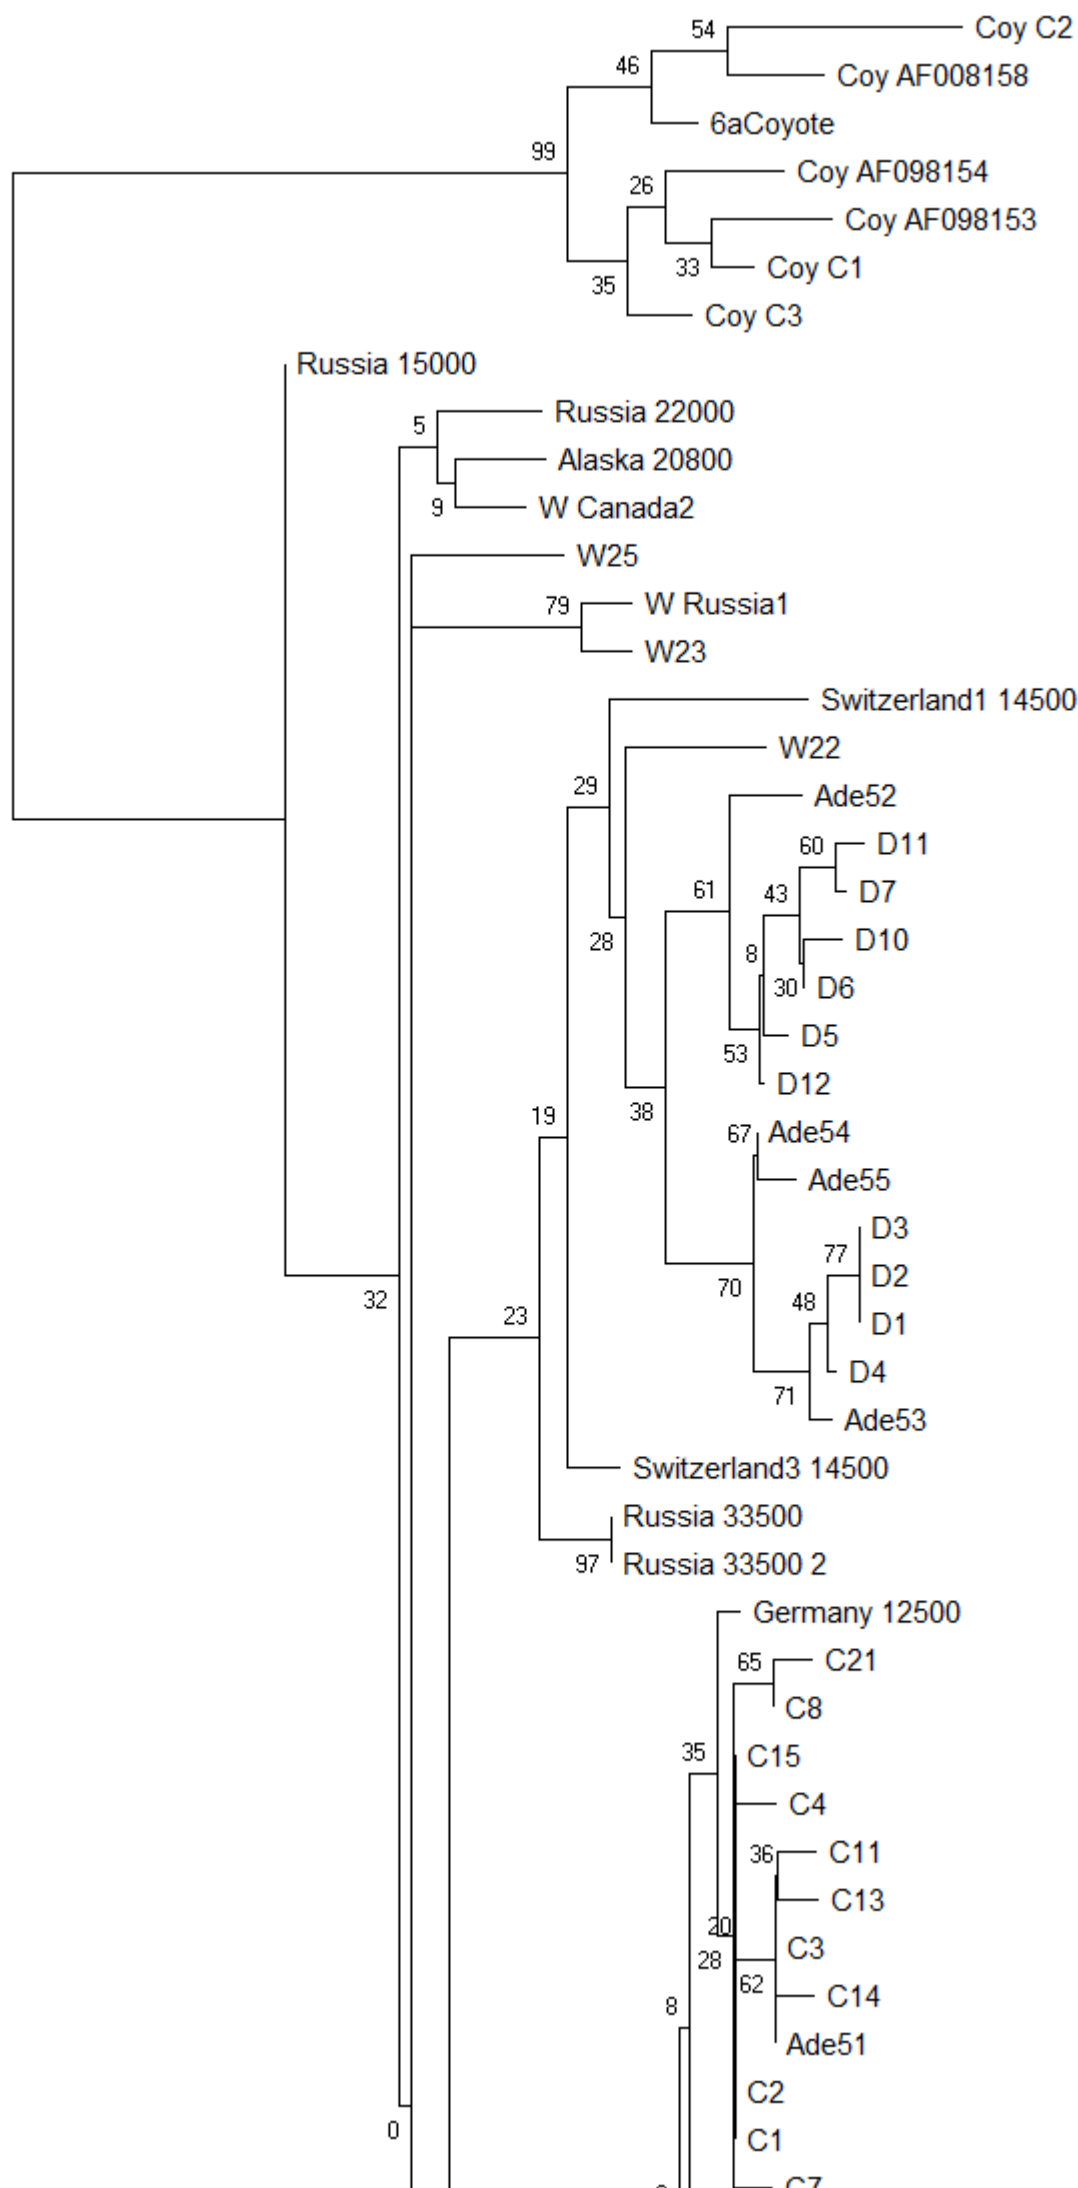

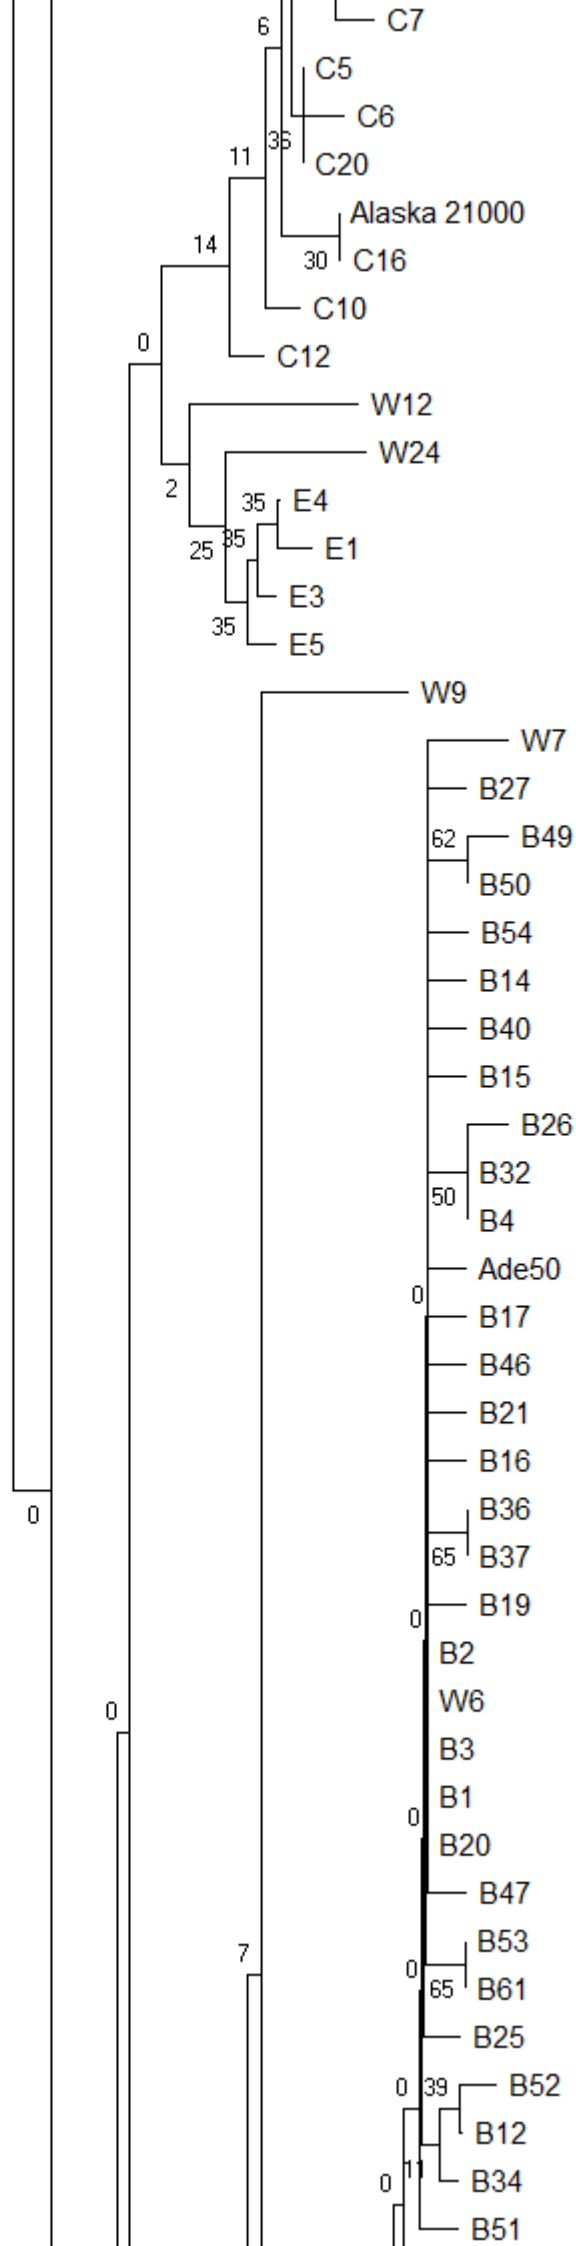

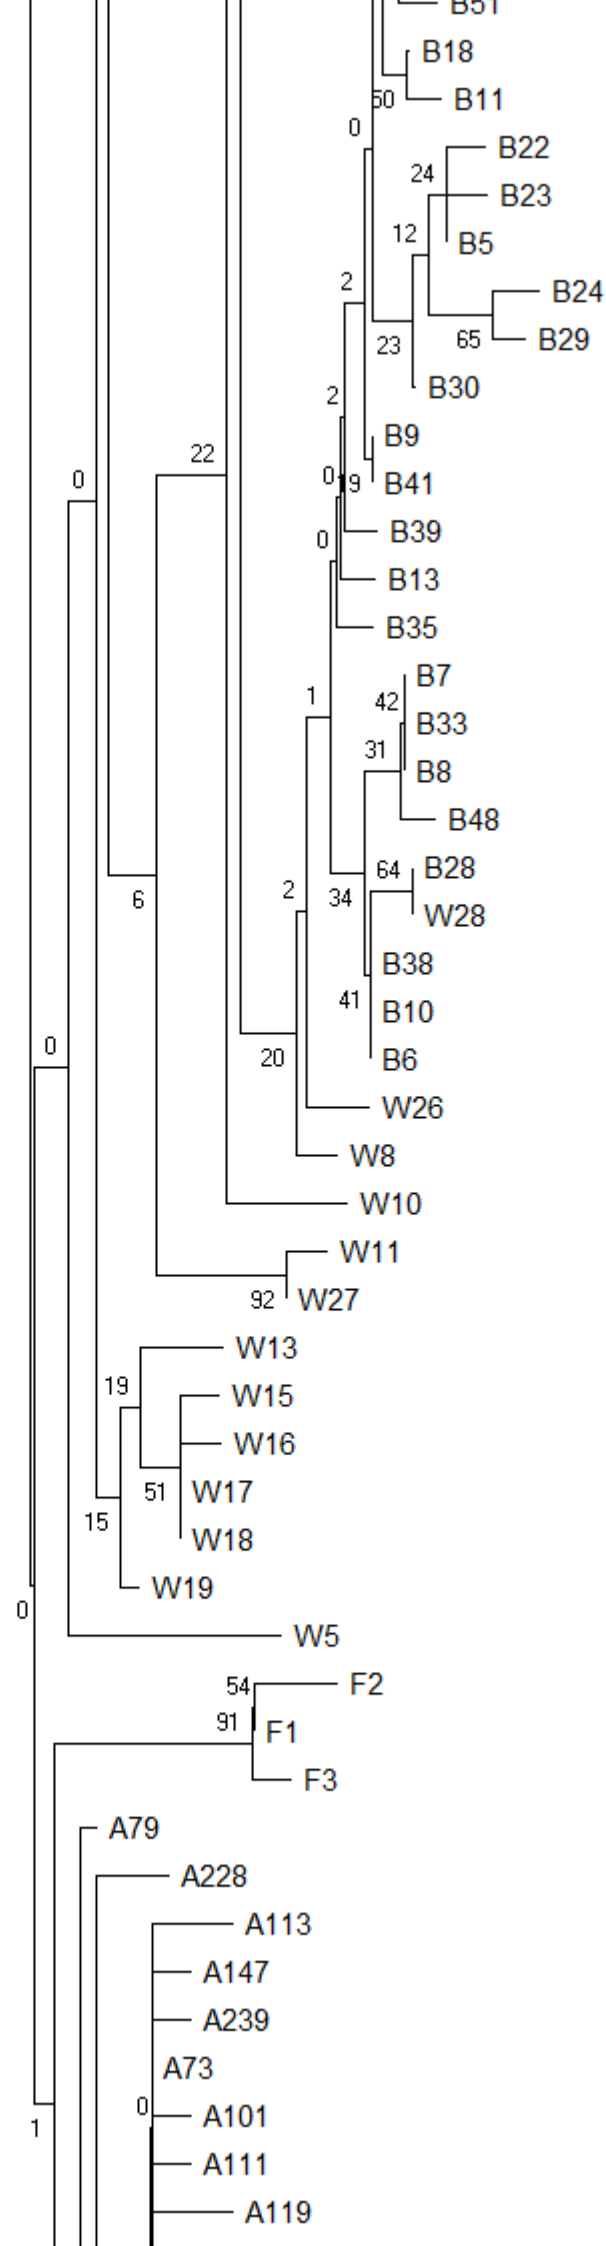

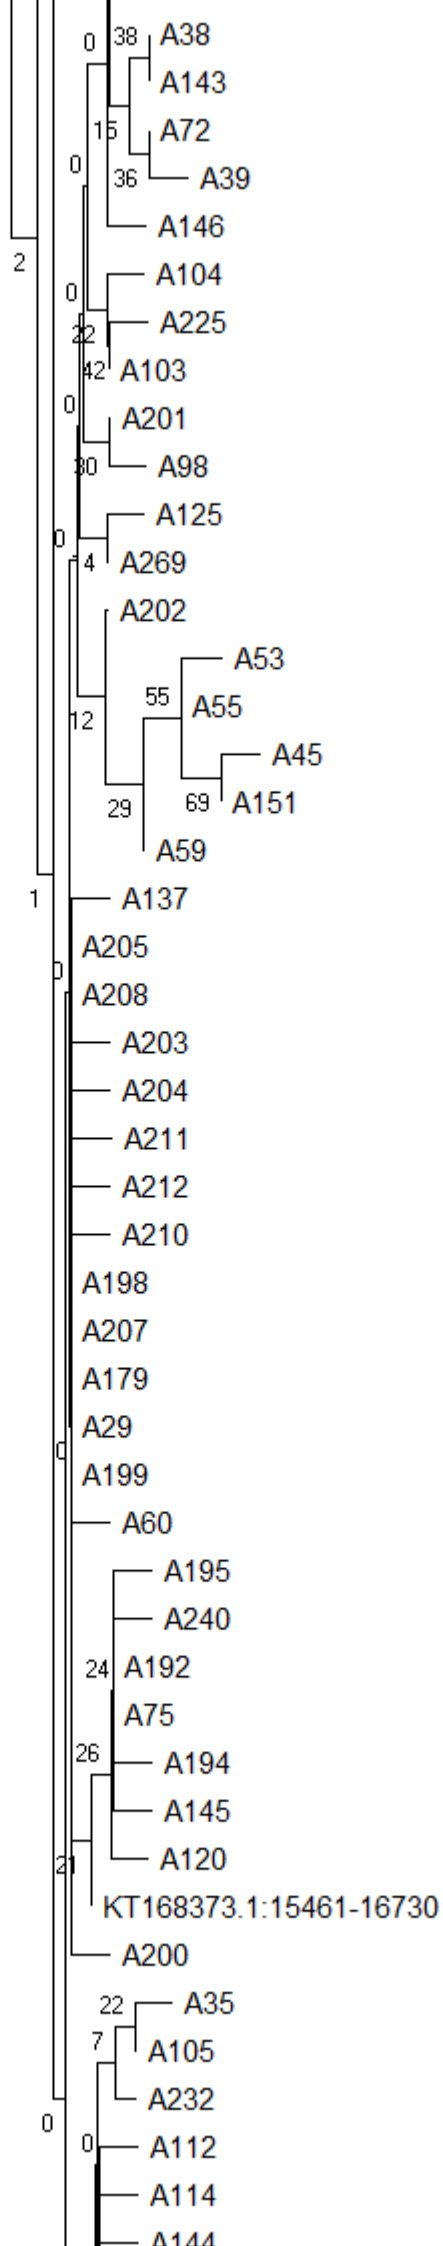

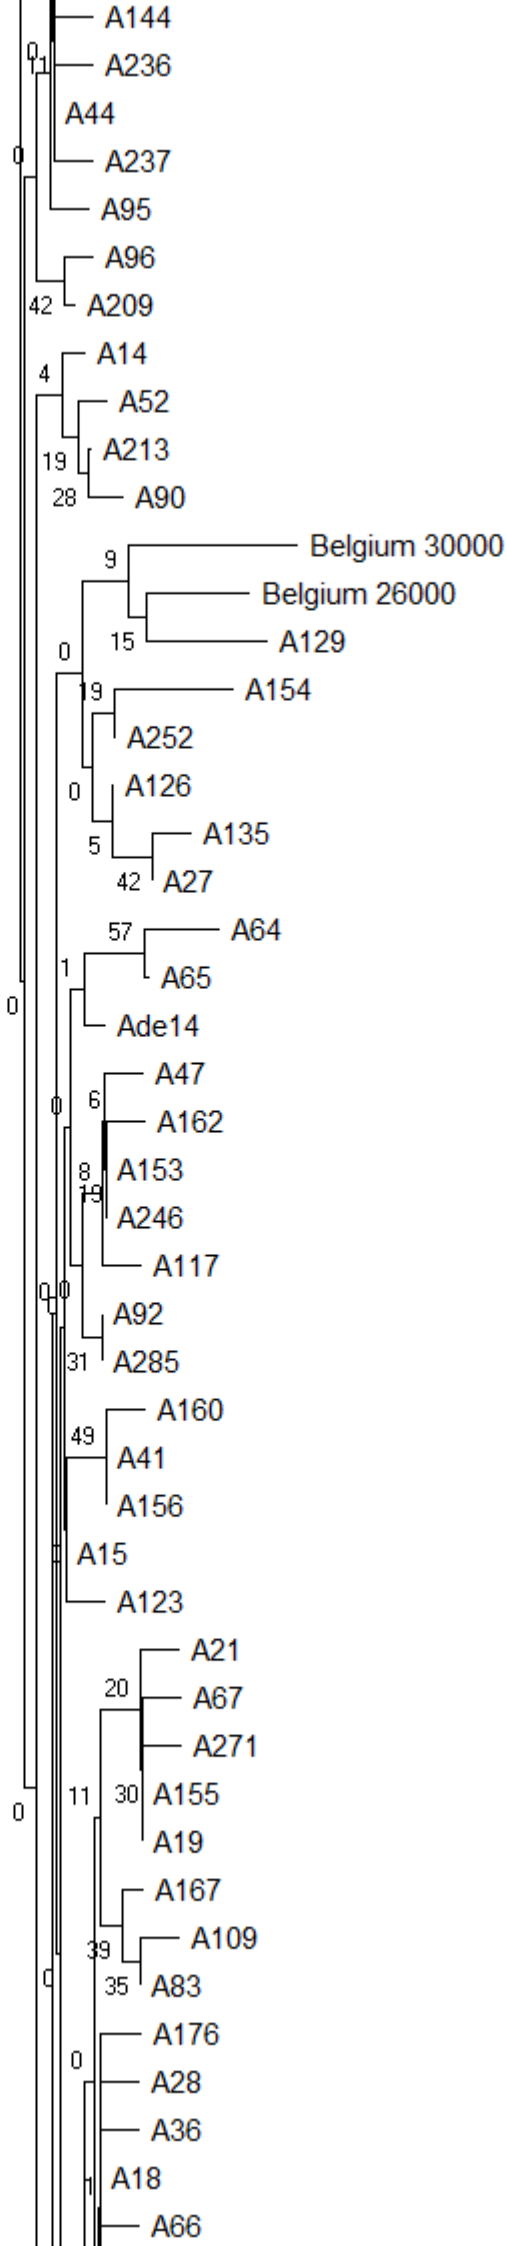

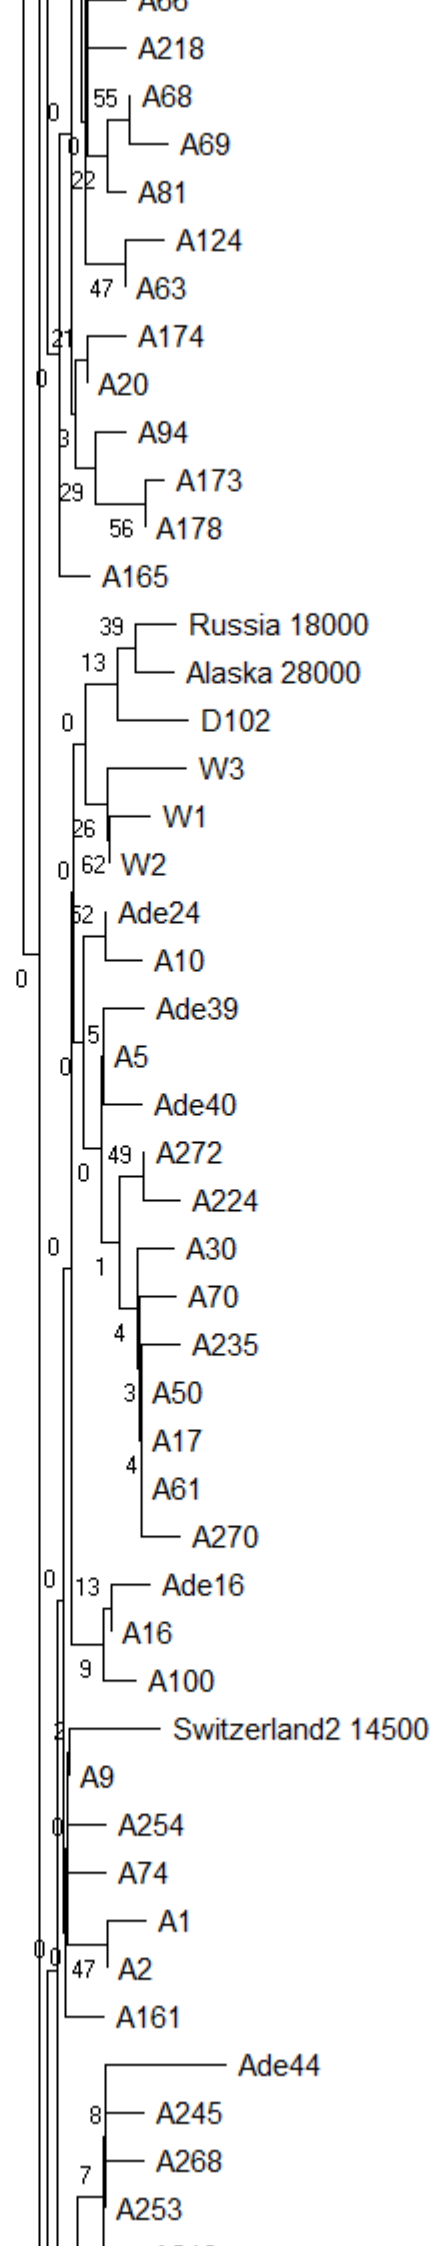

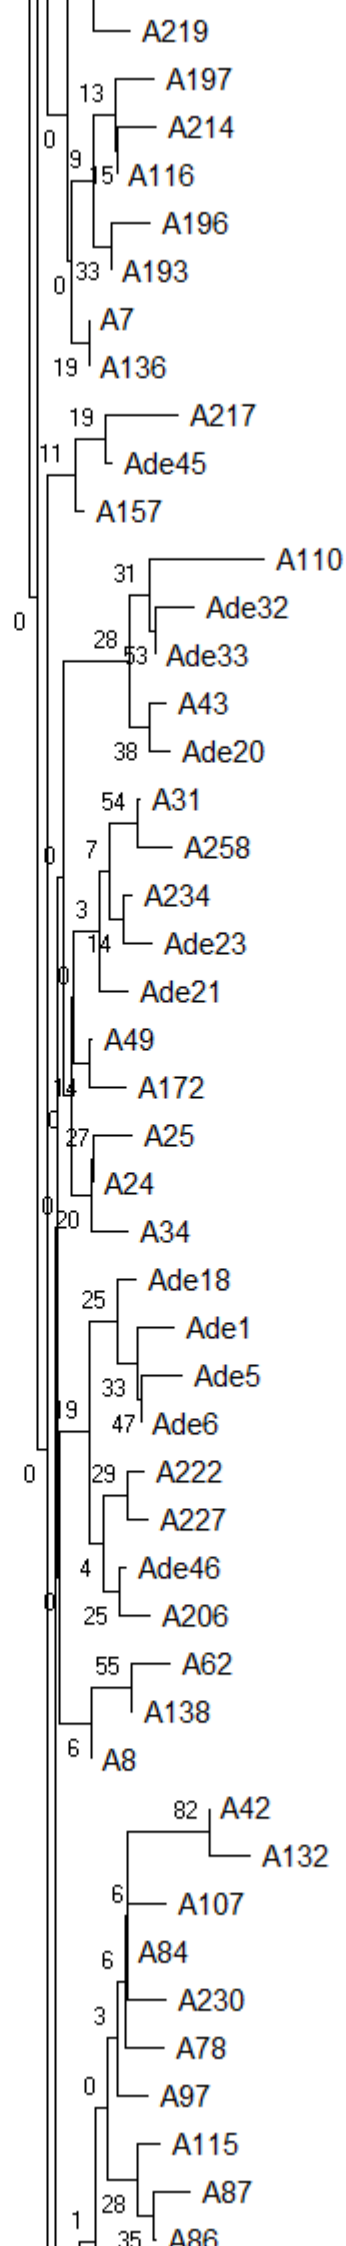

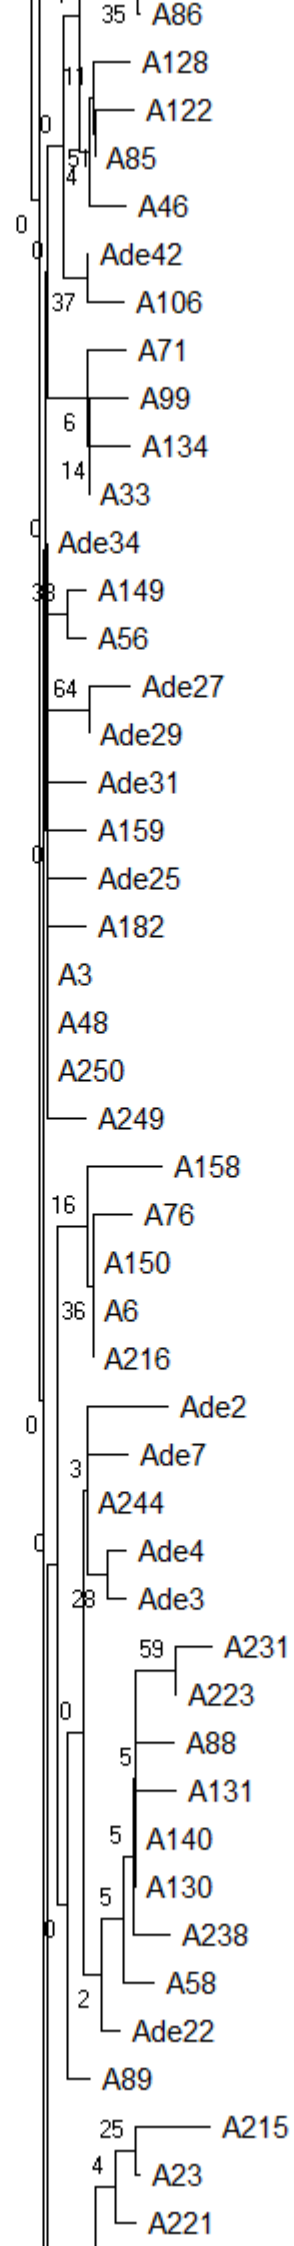



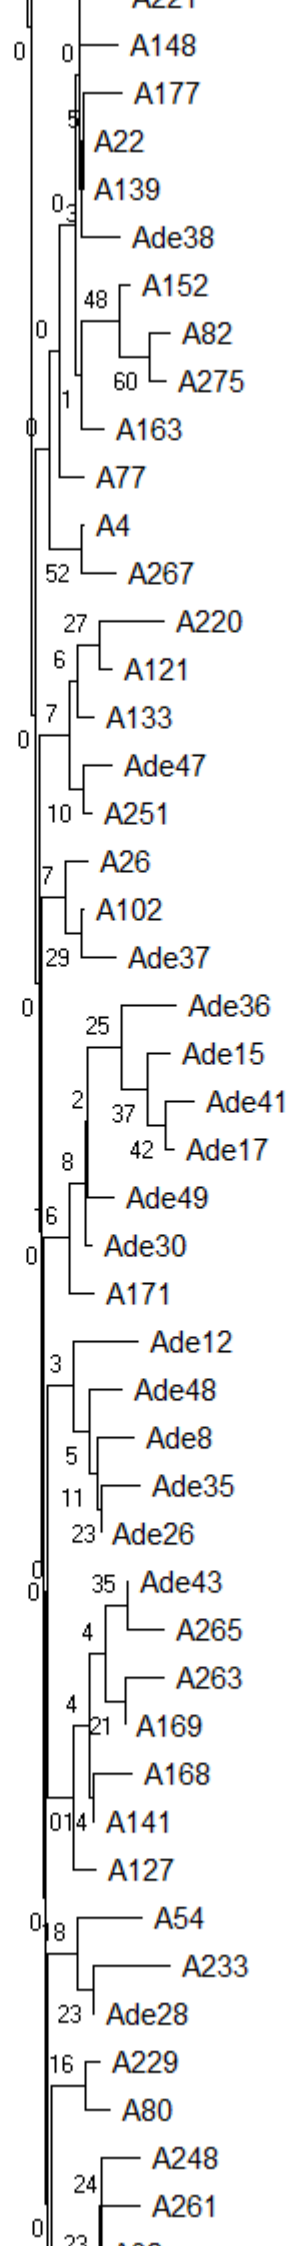

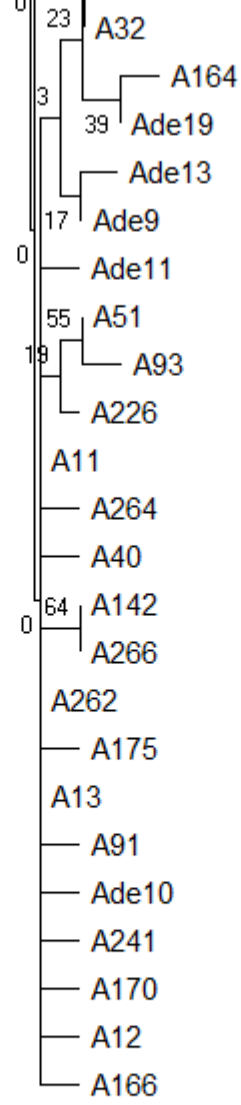

0.010

Supplement: s1 [file s1]
